# Supplementary material for: Transcriptomic Responses of the Heart and Brain to Anoxia in the Western Painted Turtle
Source: PLOS journal article supplement (doi:10.1371/journal.pone.0131669), 2015-07-06

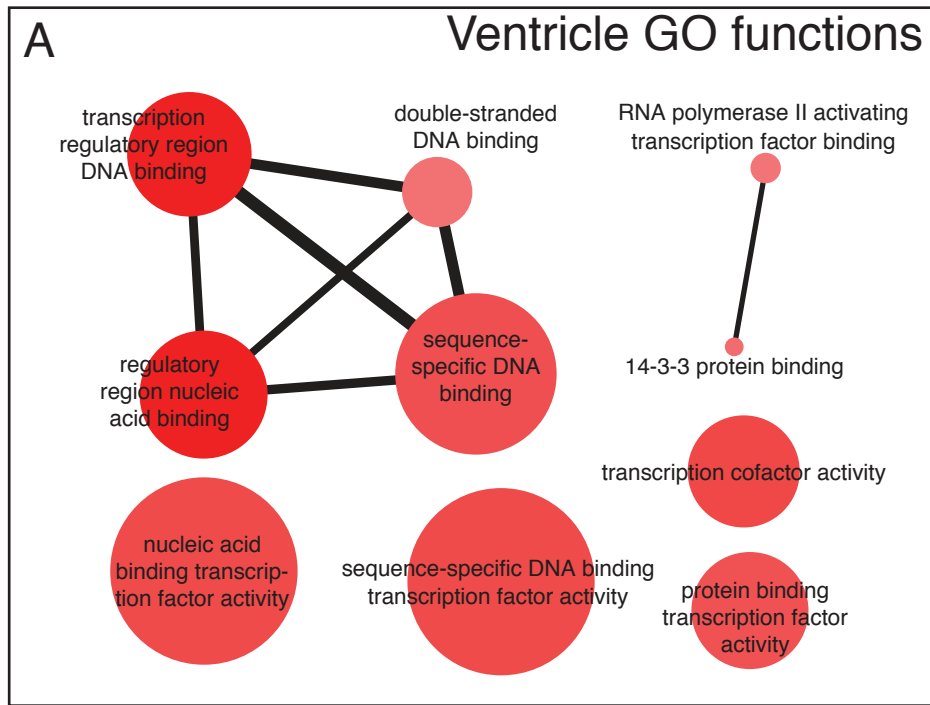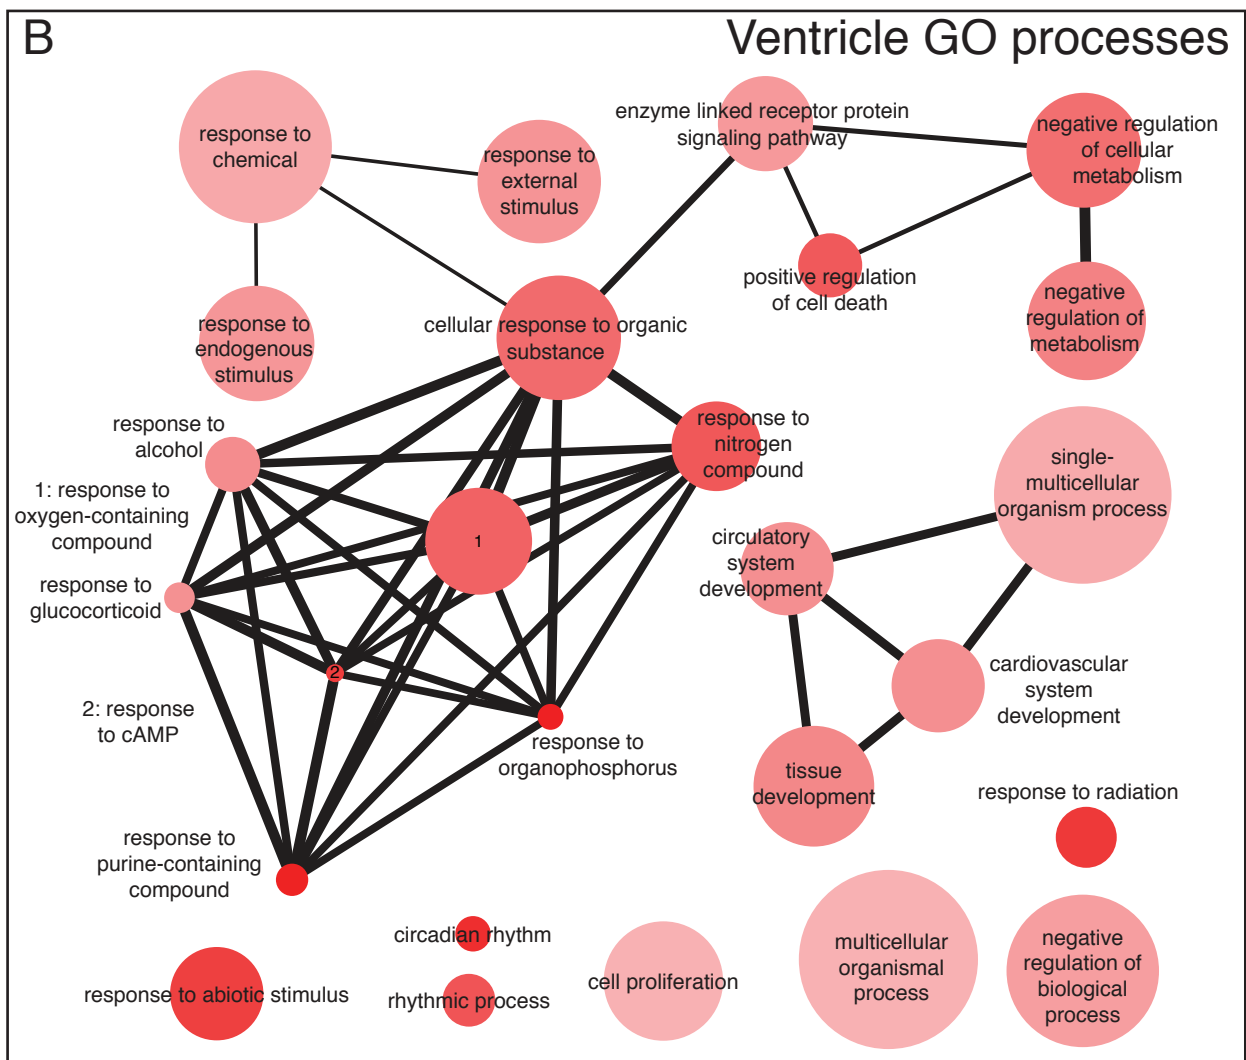

Supplement: S2 (10.1371/journal.pone.0131669.s002) [file journal.pone.0131669.s002]
