# Supplementary material for: Transcriptomic Responses of the Heart and Brain to Anoxia in the Western Painted Turtle
Source: PLOS journal article supplement (doi:10.1371/journal.pone.0131669), 2015-07-06
Supplement: S11 (10.1371/journal.pone.0131669.s011) [file journal.pone.0131669.s011]

**S7 Table. Gene Ontology (GO) function-based outputs from genes that were significantly increased in telencephalon of anoxic painted turtles.**

| Gene Ontology Term                                                | Corrected p-values | FDR Rate | Orthologs       |
|-------------------------------------------------------------------|--------------------|----------|-----------------|
| double-stranded DNA binding                                       | 0.0005089          | 0.00%    | JUNB, EGR1, JUN |
| structure-specific DNA binding                                    | 0.0040734          | 0.00%    | JUNB, EGR1, JUN |
| RNA polymerase II regulatory region sequence-specific DNA binding | 0.0077373          | 0.00%    | JUNB, EGR1, JUN |
| RNA polymerase II regulatory region DNA binding                   | 0.0080879          | 0.00%    | JUNB, EGR1, JUN |

*Corrected P-values represent the Simulation Corrected P-values generated from the GO Term Finder.*
